# Supplementary material
Source: PubMed Central journal article supplement (PMC11072669)

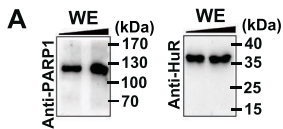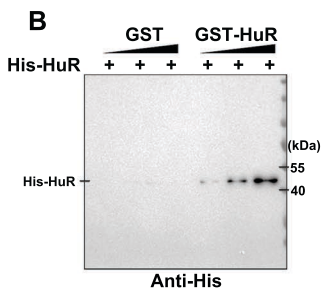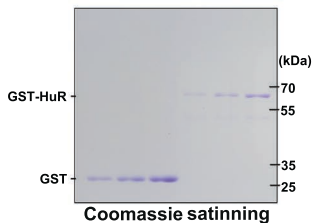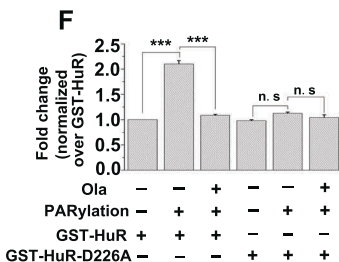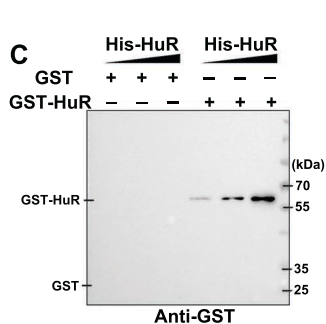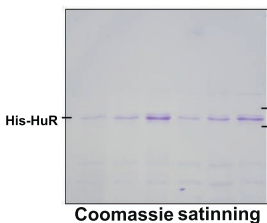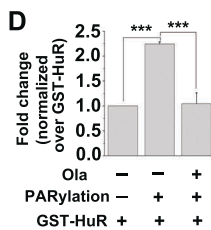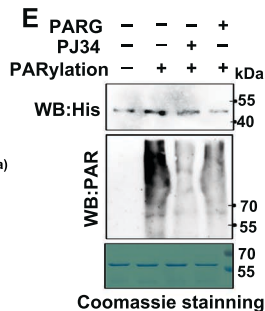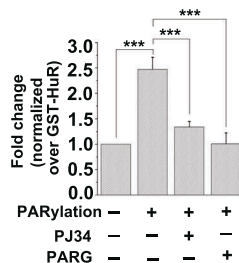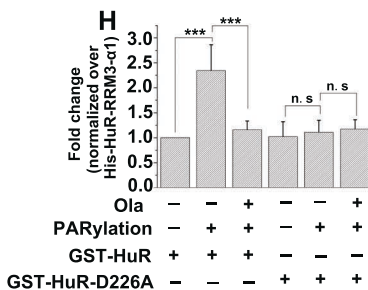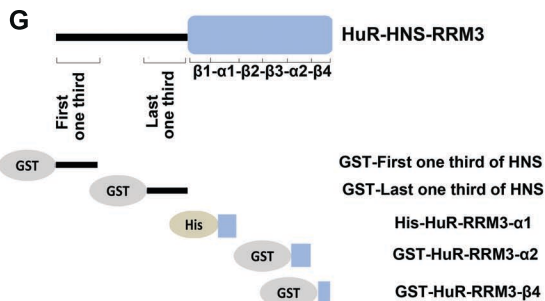

Supplement: 18_2020_3618_MOESM3_ESM.pdf [file 18_2020_3618_MOESM3_ESM.pdf]
