# Supplementary material
Source: PubMed Central journal article supplement (PMC11072669)

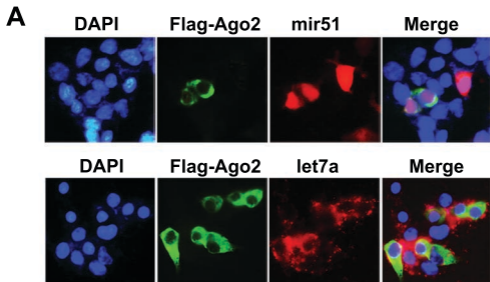

**B** mir51-enriched miRISC (M-Ago2)    let-7-enriched miRISC (L-Ago2)

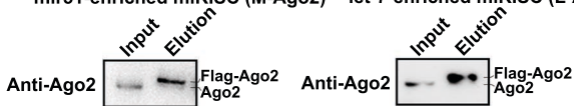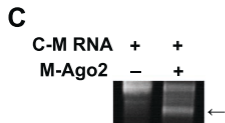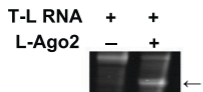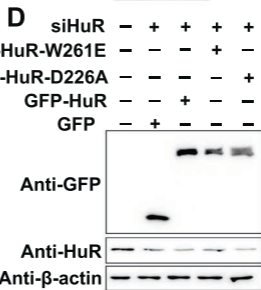

Supplement: 18_2020_3618_MOESM4_ESM.pdf [file 18_2020_3618_MOESM4_ESM.pdf]
